# Supplementary material
Source: Springer Nature journal article supplement (https://www.springermedizin.de/resource/supplementary/12950_2012_282_MOESM9_ESM.pdf/9557474)
Supplement: MOESM9 [file 9557474]

| GENE         | ratio Salm/Mock 8h |       |       | ratio 2h |      |      | ratio 4h |      |      | description                                                |
|--------------|--------------------|-------|-------|----------|------|------|----------|------|------|------------------------------------------------------------|
|              | pig 2              | pig 3 | pig 4 | 2/3      | 2/4  | 3/4  | 2/3      | 2/4  | 3/4  |                                                            |
| # genes      | 325                | 37    | 164   | 79       | 104  | 132  | 142      | 49   | 202  |                                                            |
| NFKBIA (PCR) | 7.8                | –     | 5.6   | 0.04     | 0.07 | –    | –        | –    | 7.2  | Nuclear factor-kappaB inhibitor alpha                      |
| IL8 (PCR)    | 13.1               | –     | 8.2   | 0.03     | 0.03 | –    | 10.7     | 4.1  | –    | Interleukin-8                                              |
| REG3A (PCR)  | 49.8               | –     | 11.5  | 0.09     | 0.01 | 0.03 | 14.1     | –    | 0.07 | Islet of Langerhans regenerating protein 3A (alias; PAP)   |
| TIMP1 (PCR)  | 13.1               | –     | 4.7   | –        | 0.22 | –    | 8.2      | –    | 0.23 | Metalloproteinase inhibitor 1 precursor (TIMP-1)           |
| IL1B (PCR)   | 37.7               | 3.9   | 47.5  | 0.17     | –    | –    | 25.9     | –    | 0.06 | Interleukin-1 beta                                         |
| MMP1 (PCR)   | 10.2               | 3.4   | 3.7   | 0.15     | –    | –    | 13.1     | –    | –    | Matrix metalloproteinase-1 (Interstitial collagenase)      |
| S100A9       | 22.6               | 5.4   | 4.9   | –        | –    | –    | 18.1     | 8.5  | –    | S100 calcium binding protein A9 (calgranulin B)            |
| HSD11B2      | 0.56               | 0.14  | 0.34  | –        | –    | –    | –        | –    | –    | Hydroxysteroid 11-beta dehydrogenase 2                     |
| TFF2         | 0.40               | 0.08  | 0.56  | –        | –    | –    | –        | 0.13 | –    | Trefoil factor 2 (Pancreatic spasmodic polypeptide)        |
| HSPA1B       | 1.5                | 10.4  | 0.87  | –        | –    | –    | –        | –    | –    | Heat shock 70kDa protein 1B                                |
| HSPA1A       | 0.86               | 6.2   | 0.95  | –        | –    | –    | –        | –    | –    | Heat shock 70kDa protein 1A                                |
| RAC1         | 0.71               | 0.08  | 1.3   | –        | –    | –    | –        | –    | –    | Ras-related C3 botulinum toxin substrate 1                 |
| TNFRSF12A    | 2.1                | 8.5   | 2.7   | –        | –    | –    | –        | –    | –    | TNF receptor superfamily member Fn14                       |
| NR4A1        | 1.9                | 7.2   | 3.0   | –        | 0.21 | –    | –        | –    | –    | Nuclear receptor subfamily 4, group A, member 1            |
| IRF1         | 6.4                | 6.4   | 4.1   | –        | –    | –    | –        | –    | –    | Interferon regulatory factor 1                             |
| EGR1         | 4.6                | 5.6   | 4.8   | –        | 0.15 | –    | 5.8      | 9.7  | –    | Early growth response 1                                    |
| THBS1        | 14.1               | 9.7   | 4.8   | –        | –    | –    | 8.3      | –    | 0.15 | Thrombospondin 1                                           |
| F3           | 2.0                | 3.1   | 5.3   | 0.24     | –    | –    | –        | –    | –    | Coagulation factor III                                     |
| FOS          | 3.3                | 4.2   | 8.0   | 0.20     | 0.17 | –    | 7.9      | 6.6  | –    | c-Fos protein                                              |
| DMBT1        | 8.9                | 6.9   | 8.2   | –        | 0.08 | –    | –        | –    | 0.09 | Surfactant pulmonary-associated D-binding protein (gp-340) |
| PLAUR        | 10.5               | 8.6   | 11.8  | –        | –    | –    | –        | –    | –    | Urokinase plasminogen activator surface receptor           |
| CYR61        | 11.2               | 18.1  | 36.0  | –        | –    | –    | –        | 4.9  | –    | cysteine-rich, angiogenic inducer 61                       |
| IL1RN        | 70.2               | 3.2   | 73.2  | –        | –    | –    | –        | –    | –    | Interleukin-1 receptor antagonist protein                  |
